# Supplementary material for: Enhanced aminolysis of cyclic carbonates by β-hydroxylamines for the production of fully biobased polyhydroxyurethanes
Source: Royal Society of Chemistry journal article supplement (doi:10.1039/d0gc04120c), 2021-01-01
Supplement: d0gc04120c1.pdf [file d0gc04120c1.pdf]

# Supporting information for

## Enhanced aminolysis of cyclic carbonates by $\beta$ -hydroxyamines for fully biobased polyhydroxyurethanes

Baptiste Quienne<sup>a</sup>, Rinaldo Poli<sup>b,\*</sup>, Julien Pinaud<sup>a</sup>, Sylvain Caillol<sup>a,\*</sup>

<sup>a</sup>ICGM, Univ Montpellier, CNRS, ENSCM, Montpellier, France

<sup>b</sup>CNRS, LCC (Laboratoire de Chimie de Coordination), Université de Toulouse, UPS, INPT, 205 Route de Narbonne, BP 44099, F-31077, Toulouse Cedex 4, France

### Table of content

1. Aminolysis of EC monitored by <sup>1</sup>H NMR
2. Free energy profile for 2 amine molecule pathway of EC aminolysis with CH<sub>3</sub>CH<sub>2</sub>NH<sub>2</sub>
3. Monomers NMR spectra
4. PHU thermosets IR spectra
5. DSC curves of PHU thermosets
6. TGA analysis of PHU thermosets
7. Calculated energies, views and atomic Cartesian coordinates for all optimized structures

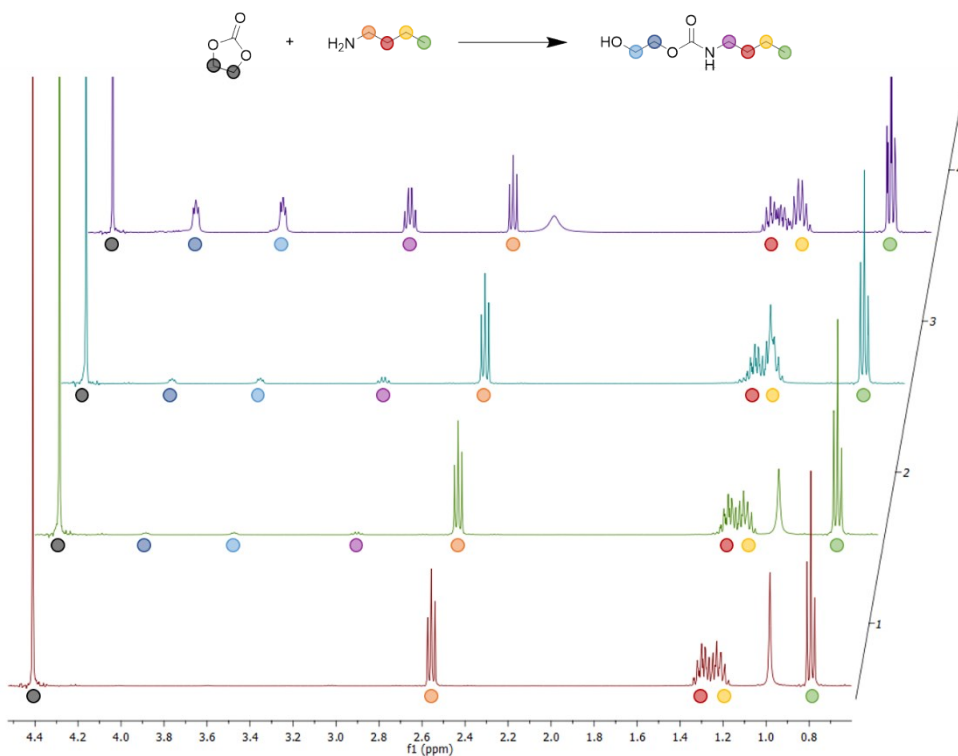

Figure S1:  $^1\text{H}$  NMR monitoring of the aminolysis of ethylene carbonate (1 mol/L) with butylamine (1 mol/L) over the time in  $\text{CDCl}_3$  at 25°C. **Spectrum 1:** t = 9 min; **spectrum 2:** t = 1 h; **spectrum 3:** t = 2 h; **spectrum 4:** t = 14 h

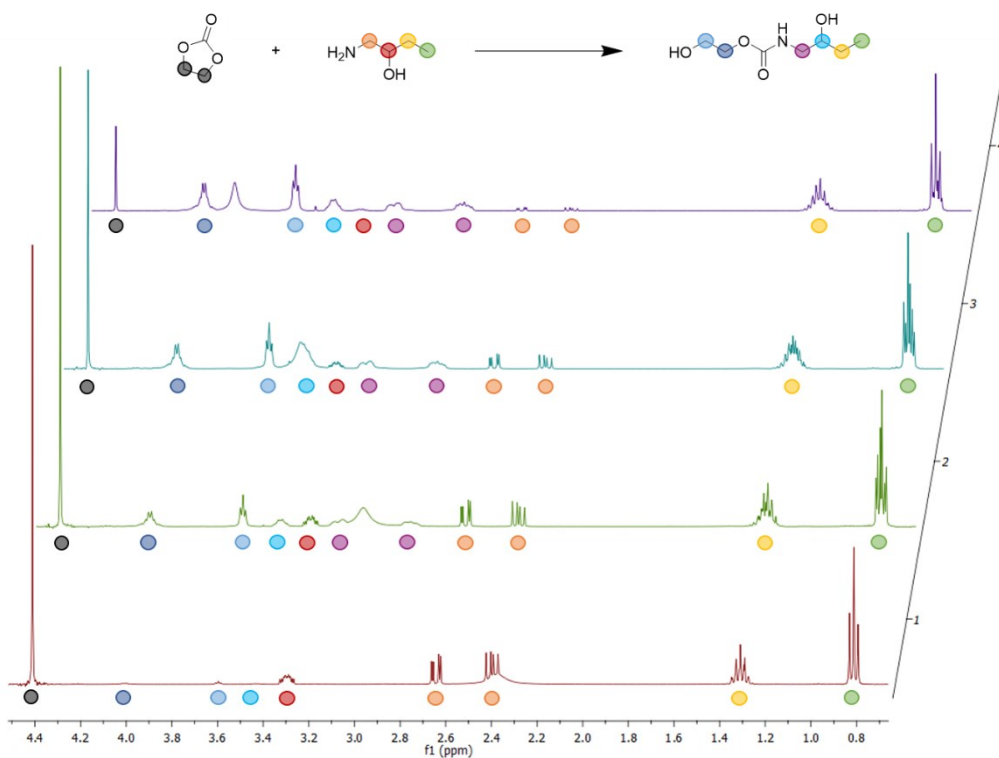

Figure S2:  $^1\text{H}$  NMR monitoring of the aminolysis of ethylene carbonate (1 mol/L) with 1-amino-2-butanol (1 mol/L) over the time in  $\text{CDCl}_3$  at 25°C. **Spectrum 1:** t = 5 min; **spectrum 2:** t = 1 h; **spectrum 3:** t = 2 h; **spectrum 4:** t = 14 h



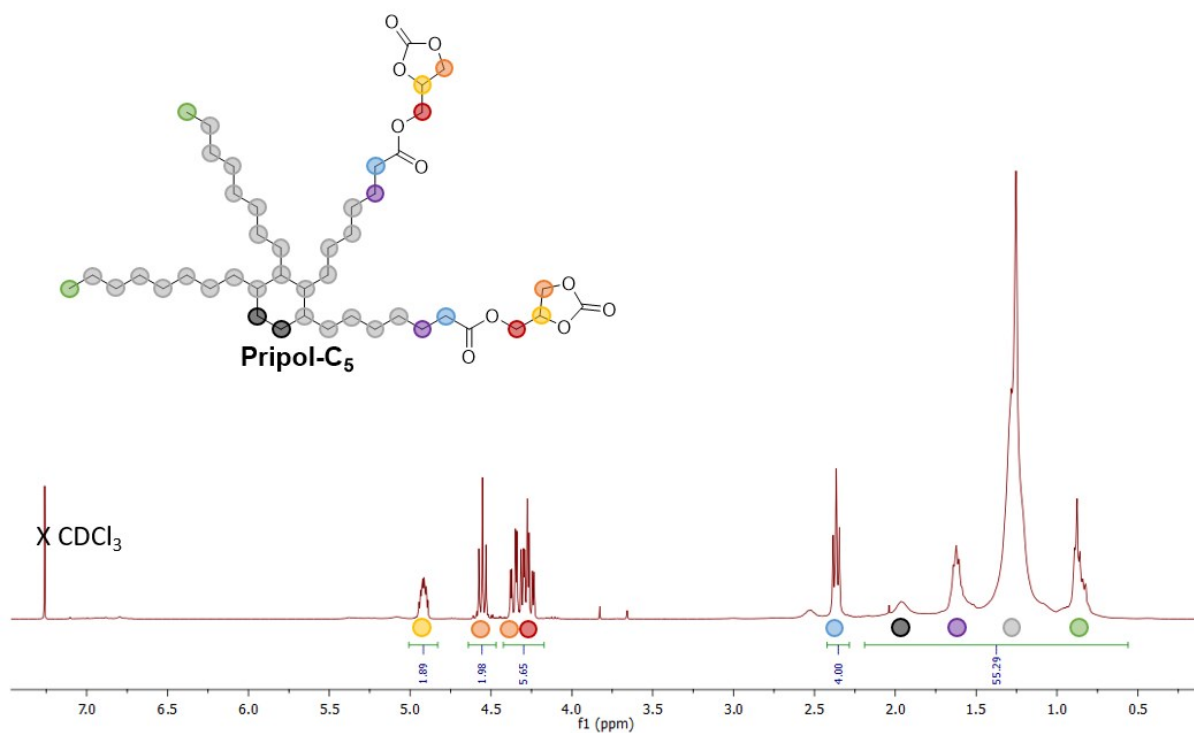

Figure S5: <sup>1</sup>H NMR spectrum of Pripol-C<sub>5</sub> in CDCl<sub>3</sub>. Pripol is represented as an ideal structure.

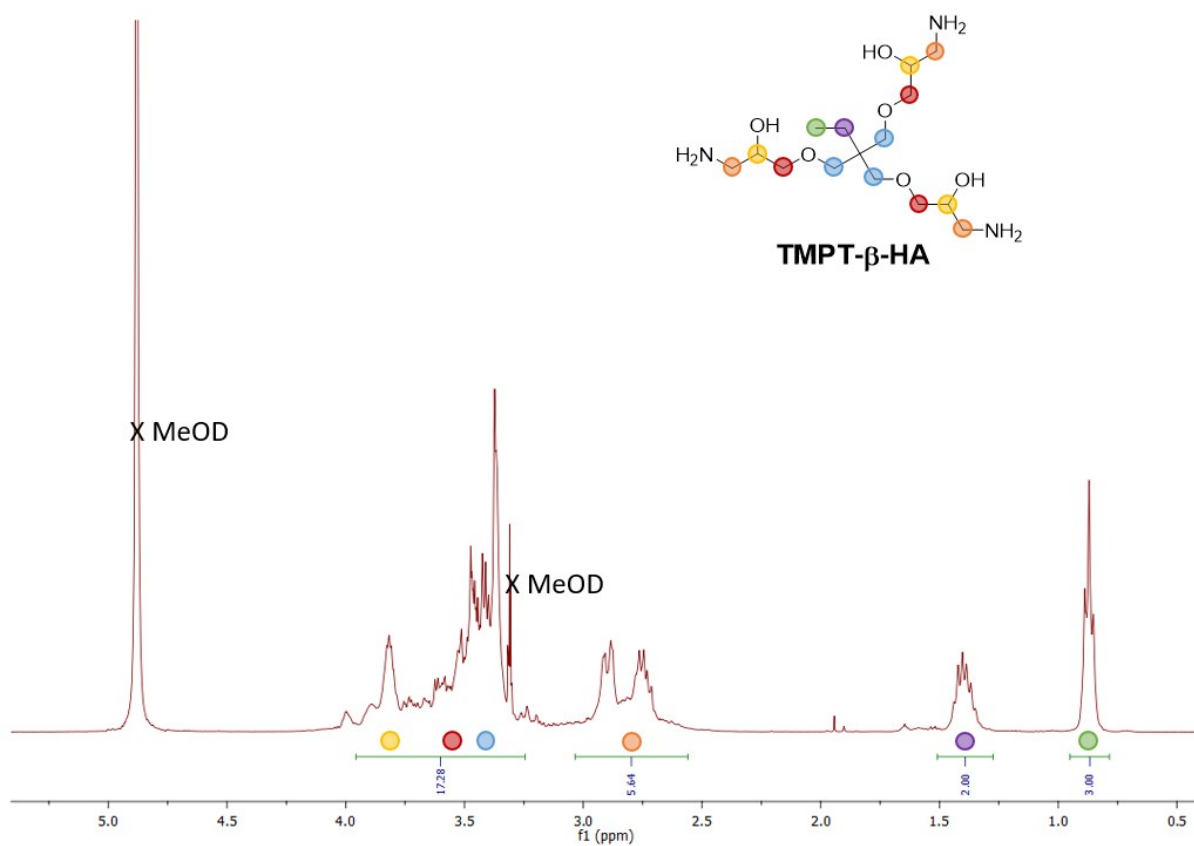

Figure S6: <sup>1</sup>H NMR spectrum of TMPT-β-HA in MeOD

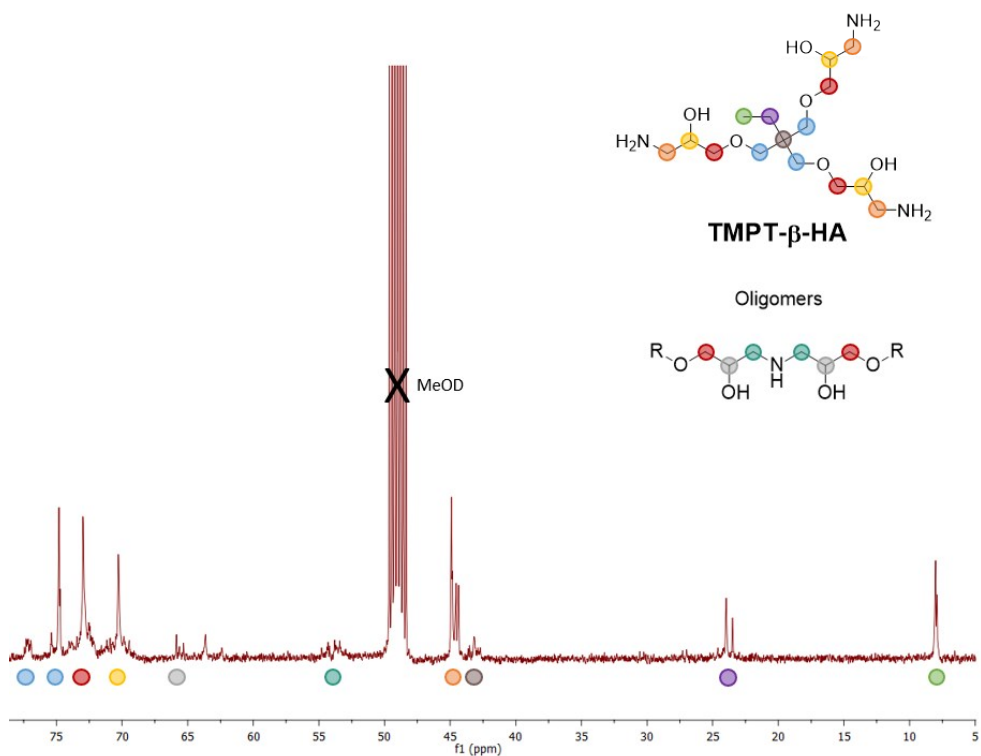

Figure S7:  $^{13}\text{C}$  NMR spectrum of TMPT-β-HA in MeOD

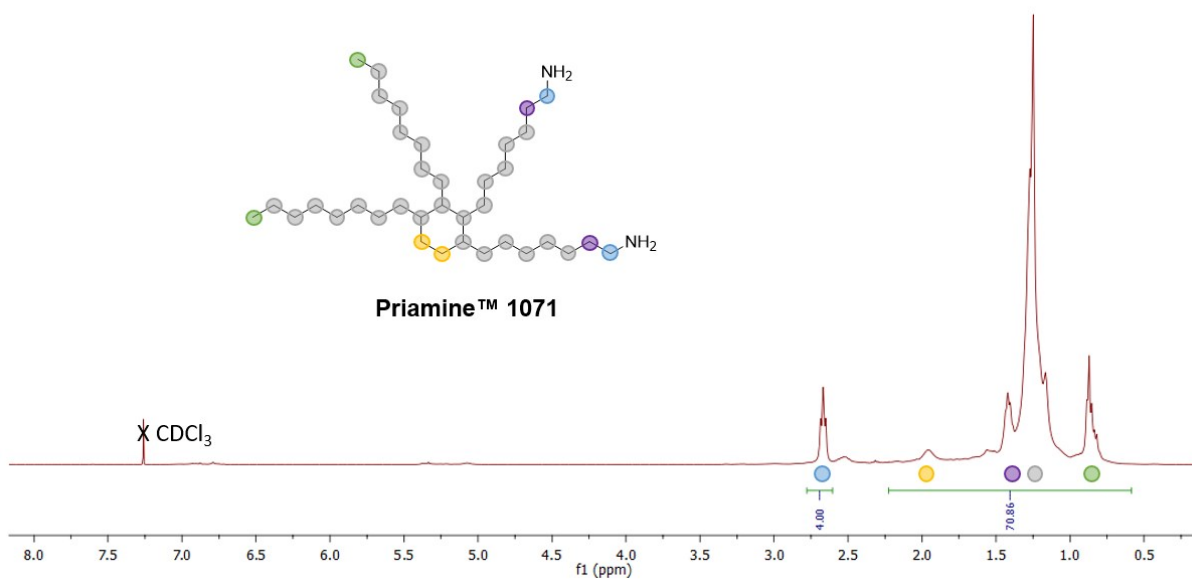

Figure S8:  $^1\text{H}$  NMR spectrum of Priamine™ 1071 in  $\text{CDCl}_3$ . Priamine™ 1071 is represented with an ideal structure.

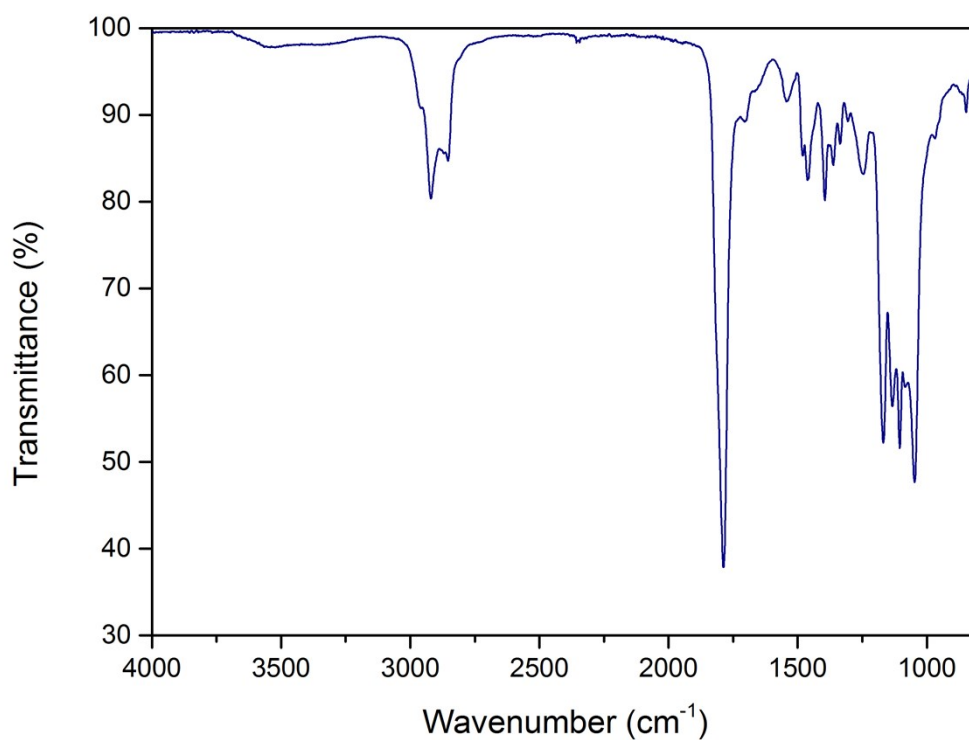

Figure S9: FTIR spectrum of PHU1

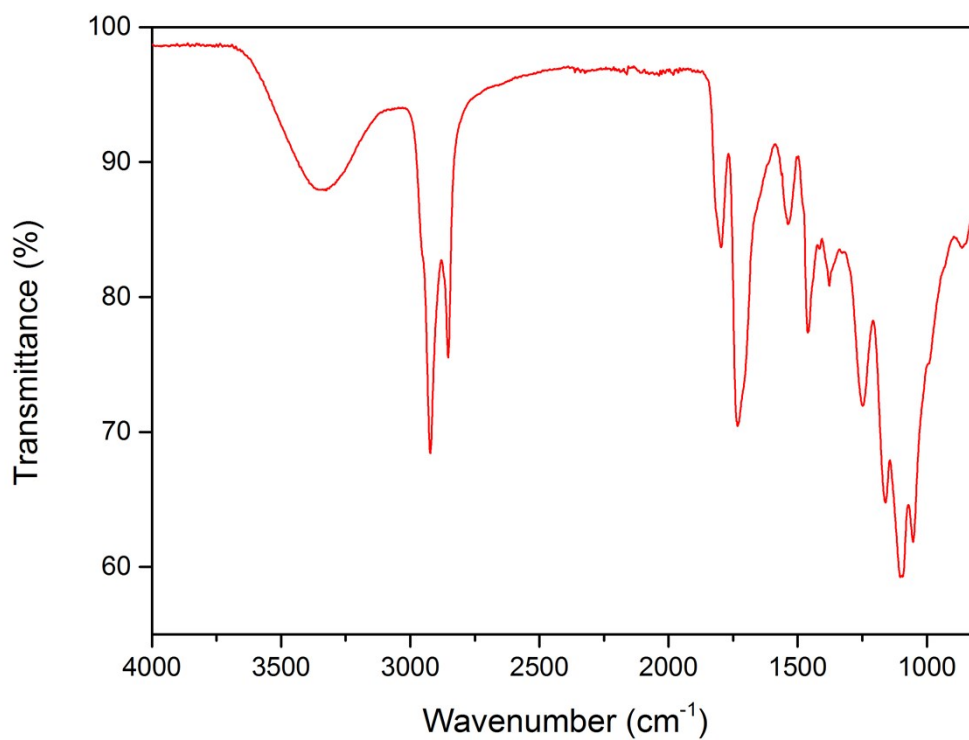

Figure S10: FTIR spectrum of PHU2

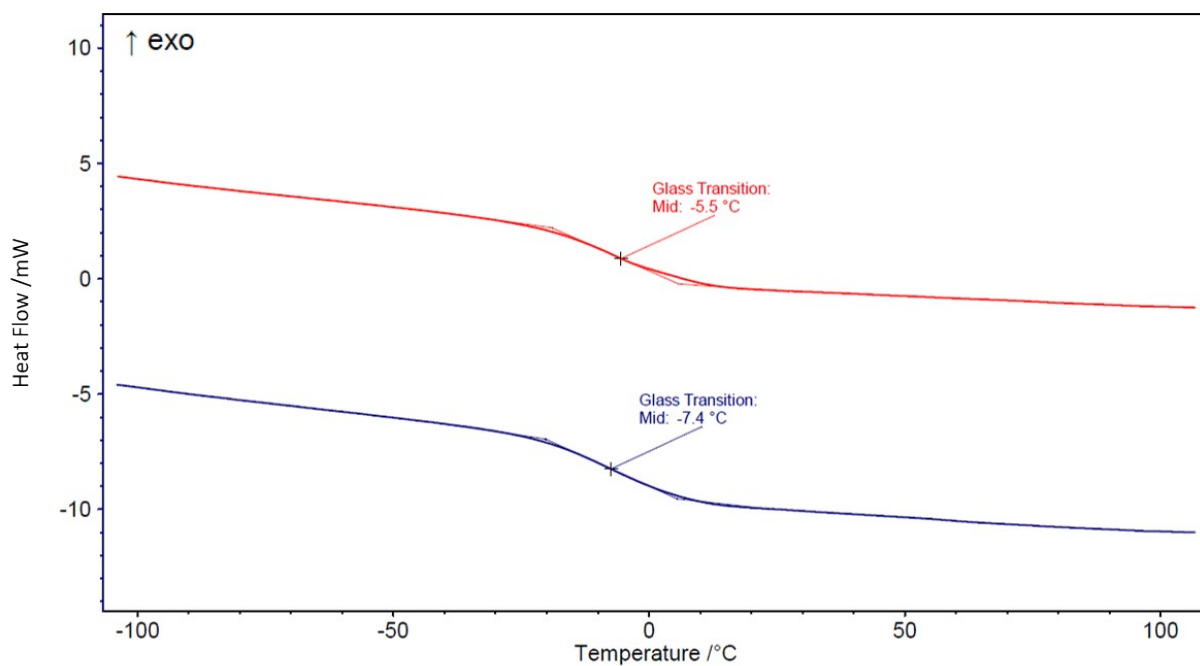

Figure S11: DSC thermograms of PHU1 (blue) and PHU2 (red)

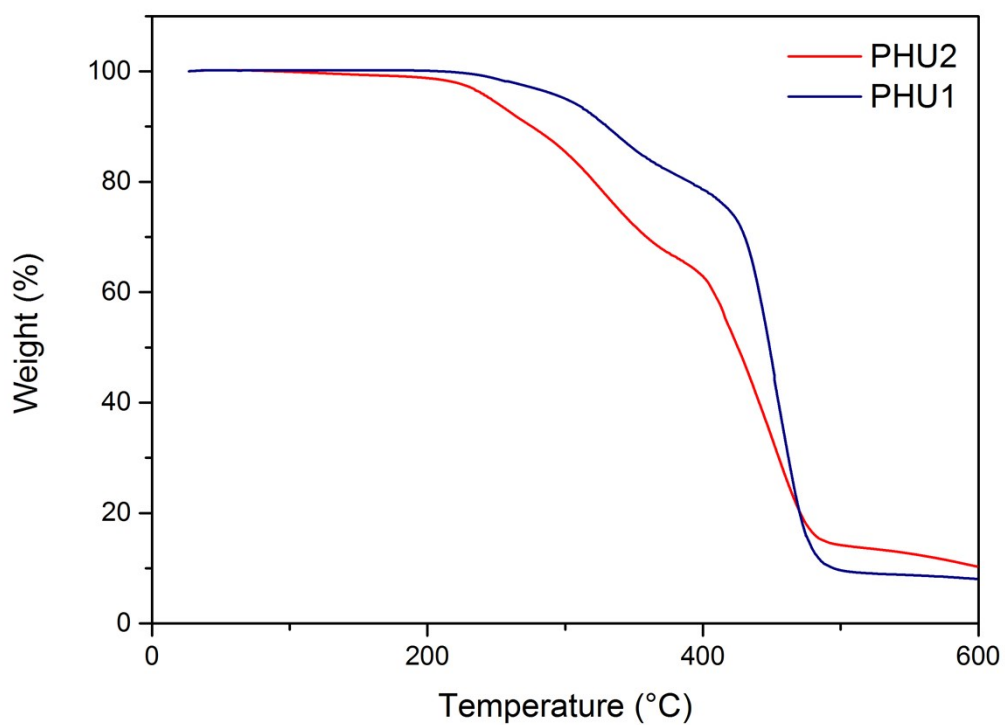

Figure S12: TGA curves of PHU thermosets

Table S1. Calculated energies (E-D<sub>3</sub><sub>CHCl<sub>3</sub></sub> and G-D<sub>3</sub><sub>CHCl<sub>3</sub>,298K,1M</sub> in hartrees), views and atomic Cartesian coordinates (in Å) for all optimized structures.

**A. Reagents**

**Ethylene carbonate (EC)**

E = -342.516350959

G = -342.469392

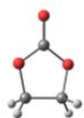

|   |              |              |              |
|---|--------------|--------------|--------------|
| 6 | 0.848373000  | -0.000068000 | 0.000028000  |
| 8 | 0.077144000  | 1.120014000  | 0.116006000  |
| 8 | 0.076776000  | -1.120042000 | -0.115824000 |
| 6 | -1.312055000 | 0.754014000  | -0.131042000 |
| 6 | -1.312216000 | -0.753847000 | 0.130930000  |
| 1 | -1.553416000 | 1.004374000  | -1.176229000 |
| 1 | -1.951187000 | 1.323537000  | 0.555319000  |
| 1 | -1.951428000 | -1.323249000 | -0.555469000 |
| 1 | -1.553927000 | -1.004026000 | 1.176096000  |
| 8 | 2.054247000  | -0.000126000 | -0.000084000 |

**EtNH<sub>2</sub>**

E = -135.219854975

G = -135.152756

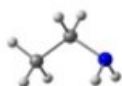

|   |              |              |              |
|---|--------------|--------------|--------------|
| 6 | -1.239983000 | -0.265520000 | -0.000011000 |
| 1 | -1.282083000 | -0.914900000 | 0.891910000  |
| 1 | -1.282149000 | -0.914810000 | -0.891978000 |
| 1 | -2.145597000 | 0.366979000  | 0.000079000  |
| 6 | 0.043466000  | 0.579728000  | 0.000080000  |
| 1 | 0.051032000  | 1.243061000  | -0.882967000 |
| 1 | 0.051024000  | 1.243027000  | 0.883002000  |
| 7 | 1.309026000  | -0.183891000 | 0.000011000  |
| 1 | 1.311854000  | -0.810597000 | -0.813772000 |
| 1 | 1.311836000  | -0.810769000 | 0.813666000  |

**CH<sub>3</sub>CH<sub>2</sub>NH<sub>2</sub>...NH<sub>2</sub>CH<sub>2</sub>CH<sub>3</sub>**

E = -270.44841612

G = -270.299933

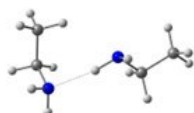

|   |              |              |              |
|---|--------------|--------------|--------------|
| 7 | 1.738936000  | 1.155209000  | 0.216861000  |
| 1 | 2.308104000  | 1.279521000  | 1.061789000  |
| 6 | 2.318900000  | 0.068645000  | -0.606566000 |
| 1 | 1.729205000  | 0.009308000  | -1.537705000 |
| 1 | 3.370141000  | 0.265699000  | -0.904628000 |
| 6 | 2.234154000  | -1.265000000 | 0.137936000  |
| 1 | 1.188024000  | -1.489090000 | 0.402172000  |
| 1 | 2.825189000  | -1.234938000 | 1.070378000  |
| 1 | 2.628599000  | -2.087685000 | -0.480665000 |
| 6 | -1.996416000 | 0.405677000  | -0.302423000 |
| 1 | -1.518433000 | 0.250174000  | -1.286352000 |
| 1 | -2.240058000 | 1.490577000  | -0.242883000 |
| 7 | -1.047340000 | -0.047815000 | 0.731115000  |
| 1 | -0.152636000 | 0.469741000  | 0.633773000  |
| 1 | -1.421549000 | 0.192648000  | 1.656343000  |
| 6 | -3.298240000 | -0.397056000 | -0.239771000 |
| 1 | -3.815571000 | -0.233877000 | 0.722431000  |
| 1 | -3.992591000 | -0.105798000 | -1.045952000 |
| 1 | -3.090222000 | -1.476222000 | -0.328964000 |
| 1 | 1.790240000  | 2.044592000  | -0.290623000 |

**HOCH<sub>2</sub>CH<sub>2</sub>NH<sub>2</sub>**

E = -210.459640109

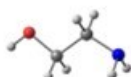

G = -210.389818

|   |              |              |              |
|---|--------------|--------------|--------------|
| 6 | -0.583411000 | -0.493059000 | -0.000008000 |
| 1 | -0.490775000 | -1.143050000 | 0.896546000  |
| 1 | -0.490633000 | -1.143034000 | -0.896577000 |
| 6 | 0.557041000  | 0.529142000  | 0.000061000  |
| 1 | 0.449776000  | 1.178702000  | -0.885668000 |
| 1 | 0.449841000  | 1.178567000  | 0.885891000  |
| 7 | 1.909887000  | -0.053171000 | -0.000031000 |
| 1 | 2.013096000  | -0.666482000 | -0.816651000 |
| 1 | 2.013203000  | -0.666389000 | 0.816641000  |
| 8 | -1.826412000 | 0.230508000  | -0.000113000 |
| 1 | -2.544201000 | -0.426686000 | 0.000620000  |

**HOCH<sub>2</sub>CH<sub>2</sub>NH<sub>2</sub>...NH<sub>2</sub>CH<sub>2</sub>CH<sub>2</sub>OH**

E = -420.953641688

G = -420.794179

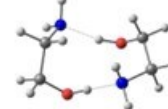

|   |              |              |              |
|---|--------------|--------------|--------------|
| 7 | -1.361962000 | 1.493574000  | 0.237795000  |
| 1 | -2.004601000 | 1.841369000  | -0.483249000 |
| 6 | -1.920523000 | 0.271757000  | 0.854164000  |
| 1 | -1.179937000 | -0.098251000 | 1.583805000  |
| 1 | -2.864253000 | 0.451858000  | 1.409937000  |
| 6 | -2.189883000 | -0.809073000 | -0.204498000 |
| 1 | -3.053728000 | -0.499293000 | -0.823661000 |
| 1 | -2.501952000 | -1.733290000 | 0.333963000  |
| 6 | 2.334517000  | -0.627090000 | 0.161361000  |
| 1 | 2.654062000  | -0.918390000 | -0.852982000 |
| 1 | 3.184004000  | -0.813424000 | 0.851773000  |
| 7 | 1.136330000  | -1.427494000 | 0.505812000  |
| 1 | 1.351829000  | -2.427941000 | 0.440875000  |
| 1 | 0.885655000  | -1.257664000 | 1.486739000  |
| 6 | 2.023751000  | 0.875289000  | 0.152111000  |
| 1 | 1.619166000  | 1.166749000  | 1.147726000  |
| 1 | 2.982807000  | 1.415292000  | 0.030563000  |
| 1 | -1.283483000 | 2.239065000  | 0.936586000  |
| 8 | -1.109164000 | -1.036069000 | -1.095635000 |
| 1 | -0.277421000 | -1.145705000 | -0.539915000 |
| 8 | 1.154763000  | 1.263005000  | -0.899766000 |
| 1 | 0.215315000  | 1.236285000  | -0.543023000 |

**B. Amine two-molecule pathway**

**EC... CH<sub>3</sub>CH<sub>2</sub>NH<sub>2</sub>...NH<sub>2</sub>CH<sub>2</sub>CH<sub>3</sub>**

E = -612.981768028

G = -612.770246

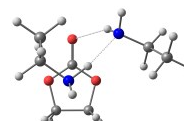

|   |              |              |              |
|---|--------------|--------------|--------------|
| 6 | 1.359517000  | -0.691405000 | 0.930515000  |
| 8 | 2.460979000  | -0.101457000 | 0.412145000  |
| 8 | 0.827851000  | -1.609211000 | 0.085251000  |
| 6 | 2.667770000  | -0.560424000 | -0.952392000 |
| 6 | 1.494684000  | -1.528812000 | -1.203727000 |
| 1 | 3.654132000  | -1.044045000 | -0.999863000 |
| 1 | 2.628037000  | 0.316385000  | -1.610879000 |
| 1 | 1.812923000  | -2.542426000 | -1.484176000 |
| 1 | 0.775747000  | -1.121567000 | -1.926199000 |
| 8 | 0.918422000  | -0.456349000 | 2.035523000  |
| 1 | -1.251252000 | -0.446143000 | 1.502754000  |
| 7 | -0.006757000 | 1.258539000  | -0.991824000 |
| 1 | -0.407415000 | 1.588322000  | -1.877761000 |
| 6 | 0.374377000  | 2.428583000  | -0.175687000 |



|   |              |              |              |
|---|--------------|--------------|--------------|
| 1 | 0.756683000  | 2.049218000  | 0.787399000  |
| 1 | 1.224077000  | 2.939519000  | -0.664274000 |
| 6 | -0.758939000 | 3.434961000  | 0.081411000  |
| 1 | -1.601795000 | 2.942009000  | 0.594667000  |
| 1 | -1.140064000 | 3.849321000  | -0.868791000 |
| 1 | -0.422200000 | 4.279851000  | 0.708488000  |
| 1 | -0.773380000 | 0.762303000  | -0.494659000 |
| 6 | -2.557586000 | -1.442294000 | 0.242862000  |
| 1 | -1.722075000 | -2.015022000 | -0.192240000 |
| 7 | -1.984003000 | -0.211234000 | 0.822638000  |
| 6 | -3.577547000 | -1.097015000 | -0.843653000 |
| 1 | -4.423436000 | -0.523986000 | -0.425240000 |
| 1 | -3.113716000 | -0.483414000 | -1.633989000 |
| 1 | -3.989149000 | -2.008513000 | -1.307914000 |
| 1 | -3.034750000 | -2.099208000 | 1.000963000  |
| 1 | -2.708723000 | 0.300836000  | 1.336692000  |

**(EC+2EtNH<sub>2</sub>) TS1**

E = -612.958901108  
G = -612.746074

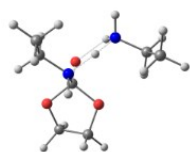

|   |              |              |              |
|---|--------------|--------------|--------------|
| 6 | 0.927635000  | -0.032024000 | 0.506309000  |
| 8 | 2.314695000  | 0.378428000  | 0.153789000  |
| 8 | 0.772731000  | -1.363095000 | -0.198004000 |
| 6 | 3.012634000  | -0.803416000 | -0.242761000 |
| 6 | 1.939684000  | -1.593117000 | -0.988540000 |
| 1 | 3.369613000  | -1.370369000 | 0.641700000  |
| 1 | 3.874729000  | -0.521523000 | -0.868379000 |
| 1 | 2.142480000  | -2.676202000 | -1.036132000 |
| 1 | 1.816075000  | -1.203910000 | -2.022858000 |
| 8 | 0.625988000  | -0.053501000 | 1.737632000  |
| 1 | -1.272843000 | -0.348282000 | 1.640543000  |
| 7 | 0.006984000  | 0.881842000  | -0.330076000 |
| 1 | 0.228104000  | 0.759450000  | -1.324977000 |
| 6 | 0.109361000  | 2.310673000  | 0.044466000  |
| 1 | -0.051975000 | 2.352776000  | 1.133596000  |
| 1 | 1.131831000  | 2.680218000  | -0.149081000 |
| 6 | -0.928219000 | 3.150530000  | -0.700075000 |
| 1 | -1.951864000 | 2.795082000  | -0.494170000 |
| 1 | -0.768269000 | 3.110102000  | -1.791163000 |
| 1 | -0.866464000 | 4.207007000  | -0.392379000 |
| 1 | -1.227234000 | 0.352334000  | 0.128039000  |
| 6 | -2.463529000 | -1.525711000 | 0.342076000  |
| 1 | -1.556010000 | -2.100430000 | 0.104961000  |
| 7 | -1.986895000 | -0.224235000 | 0.884535000  |
| 6 | -3.318291000 | -1.313980000 | -0.904459000 |
| 1 | -4.214065000 | -0.709723000 | -0.681490000 |
| 1 | -2.742765000 | -0.801667000 | -1.692524000 |
| 1 | -3.656921000 | -2.282510000 | -1.304612000 |
| 1 | -3.023085000 | -2.067405000 | 1.122350000  |
| 1 | -2.754927000 | 0.369429000  | 1.215935000  |

**(EC+2EtNH<sub>2</sub>) tetrahedral intermediate**

E = -612.973651845  
G = -612.757193

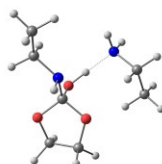

|   |              |              |              |
|---|--------------|--------------|--------------|
| 6 | 0.496302000  | -0.563502000 | 0.118861000  |
| 8 | 1.286687000  | -1.729355000 | 0.392107000  |
| 8 | -0.497959000 | -1.010742000 | -0.842476000 |
| 6 | 0.336974000  | -2.807469000 | 0.427270000  |
| 6 | -0.624548000 | -2.442790000 | -0.717940000 |
| 1 | -0.182673000 | -2.831815000 | 1.402141000  |
| 1 | 0.875502000  | -3.752752000 | 0.269001000  |

|   |              |              |              |
|---|--------------|--------------|--------------|
| 1 | -1.669656000 | -2.715022000 | -0.496213000 |
| 1 | -0.322513000 | -2.908872000 | -1.672513000 |
| 8 | -0.070244000 | -0.140612000 | 1.301943000  |
| 1 | -0.620071000 | 0.708745000  | 1.094912000  |
| 7 | 1.246966000  | 0.472176000  | -0.536325000 |
| 1 | 1.600513000  | 0.089466000  | -1.418939000 |
| 6 | 2.355628000  | 1.040496000  | 0.255680000  |
| 1 | 1.929373000  | 1.397630000  | 1.205698000  |
| 1 | 3.116049000  | 0.274744000  | 0.511565000  |
| 6 | 3.009936000  | 2.194089000  | -0.504215000 |
| 1 | 2.270973000  | 2.977417000  | -0.740219000 |
| 1 | 3.449858000  | 1.846297000  | -1.454896000 |
| 1 | 3.819172000  | 2.645187000  | 0.092695000  |
| 6 | -2.331563000 | 1.659685000  | -0.499168000 |
| 1 | -1.655268000 | 1.276436000  | -1.279004000 |
| 1 | -2.880231000 | 2.525859000  | -0.917523000 |
| 7 | -1.476676000 | 2.046171000  | 0.652700000  |
| 1 | -0.793968000 | 2.753937000  | 0.362878000  |
| 1 | -2.048838000 | 2.470984000  | 1.391214000  |
| 6 | -3.305283000 | 0.558162000  | -0.085199000 |
| 1 | -4.003110000 | 0.908852000  | 0.695310000  |
| 1 | -3.904454000 | 0.224655000  | -0.947848000 |
| 1 | -2.745240000 | -0.306534000 | 0.302791000  |

**(EC+2EtNH<sub>2</sub>) TS2**

E = -612.959459741  
G = -612.744243

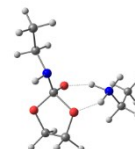

|   |              |              |              |
|---|--------------|--------------|--------------|
| 6 | 0.756292000  | 0.355236000  | -0.262904000 |
| 8 | 1.156338000  | 1.639698000  | -0.782627000 |
| 8 | -0.128935000 | 0.986561000  | 1.110967000  |
| 6 | 0.012314000  | 2.492851000  | -0.696612000 |
| 6 | -0.440506000 | 2.327482000  | 0.770641000  |
| 1 | -0.772073000 | 2.155330000  | -1.401035000 |
| 1 | 0.321156000  | 3.517571000  | -0.950826000 |
| 1 | -1.521412000 | 2.545611000  | 0.881573000  |
| 1 | 0.121587000  | 3.031159000  | 1.419781000  |
| 8 | -0.016911000 | -0.348477000 | -1.006110000 |
| 1 | -1.110941000 | -0.983593000 | -0.126104000 |
| 7 | 1.844574000  | -0.298450000 | 0.385113000  |
| 1 | 2.446318000  | 0.401221000  | 0.827059000  |
| 6 | 2.622050000  | -1.232040000 | -0.449110000 |
| 1 | 1.899576000  | -1.900889000 | -0.940709000 |
| 1 | 3.177378000  | -0.708957000 | -1.256972000 |
| 6 | 3.595912000  | -2.036661000 | 0.412422000  |
| 1 | 3.055517000  | -2.584057000 | 1.202407000  |
| 1 | 4.334931000  | -1.378949000 | 0.901937000  |
| 1 | 4.152515000  | -2.764793000 | -0.200709000 |
| 6 | -3.197756000 | -0.626342000 | 0.269494000  |
| 1 | -3.125004000 | 0.325942000  | -0.277075000 |
| 1 | -3.820935000 | -0.459708000 | 1.161755000  |
| 7 | -1.815206000 | -0.958824000 | 0.714598000  |
| 1 | -1.328419000 | -0.142424000 | 1.213696000  |
| 1 | -1.773290000 | -1.820894000 | 1.270212000  |
| 6 | -3.775407000 | -1.722723000 | -0.619916000 |
| 1 | -3.837009000 | -2.682948000 | -0.081104000 |
| 1 | -4.791853000 | -1.451260000 | -0.944878000 |
| 1 | -3.154954000 | -1.866515000 | -1.518914000 |

**(EC+2EtNH<sub>2</sub>) product**

E = -613.00529134  
G = -612.731899

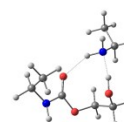

|   |              |              |              |
|---|--------------|--------------|--------------|
| 6 | 1.255412000  | 0.246508000  | -0.809236000 |
| 8 | 1.027971000  | 1.596359000  | -0.866204000 |
| 8 | -0.351113000 | 1.244904000  | 1.628789000  |
| 6 | -0.355246000 | 2.012625000  | -0.715631000 |
| 6 | -0.636718000 | 2.327671000  | 0.756962000  |
| 1 | -1.015606000 | 1.219792000  | -1.100179000 |
| 1 | -0.472891000 | 2.913050000  | -1.338894000 |
| 1 | -1.692491000 | 2.674213000  | 0.827164000  |
| 1 | 0.004989000  | 3.171799000  | 1.065983000  |
| 8 | 0.414748000  | -0.623006000 | -1.054600000 |
| 1 | -1.177508000 | -1.068094000 | 0.051186000  |
| 7 | 2.566786000  | 0.001027000  | -0.534455000 |
| 1 | 3.099645000  | 0.781124000  | -0.153046000 |
| 6 | 3.023588000  | -1.358217000 | -0.234327000 |
| 1 | 2.523828000  | -2.034816000 | -0.943644000 |
| 1 | 4.104940000  | -1.399599000 | -0.439908000 |
| 6 | 2.721786000  | -1.777026000 | 1.209831000  |
| 1 | 1.638321000  | -1.730295000 | 1.402439000  |
| 1 | 3.225645000  | -1.109217000 | 1.927704000  |
| 1 | 3.065676000  | -2.807720000 | 1.397232000  |
| 6 | -3.188548000 | -0.585154000 | 0.143279000  |
| 1 | -3.082581000 | 0.338765000  | -0.451668000 |
| 1 | -3.913770000 | -0.360512000 | 0.944026000  |
| 7 | -1.881061000 | -0.858308000 | 0.775142000  |
| 1 | -0.983439000 | 0.489416000  | 1.398740000  |
| 1 | -1.949254000 | -1.686270000 | 1.376657000  |
| 6 | -3.714761000 | -1.717530000 | -0.747907000 |
| 1 | -3.842489000 | -2.647436000 | -0.167370000 |
| 1 | -4.690726000 | -1.458245000 | -1.193368000 |
| 1 | -3.008299000 | -1.924292000 | -1.569569000 |

### C. Hydroxylamine two-molecule pathway

EC...HOCH<sub>2</sub>CH<sub>2</sub>NH<sub>2</sub>...NH<sub>2</sub>CH<sub>2</sub>CH<sub>2</sub>OH

E = -763.474846537

G = -763.252799

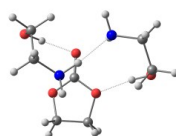

|   |              |              |              |
|---|--------------|--------------|--------------|
| 6 | 0.582272000  | 1.066738000  | -0.843582000 |
| 8 | 1.690559000  | 1.767158000  | -0.537667000 |
| 8 | -0.511900000 | 1.542039000  | -0.182578000 |
| 6 | 1.422879000  | 2.543581000  | 0.665457000  |
| 6 | -0.108216000 | 2.652335000  | 0.673825000  |
| 1 | 1.932224000  | 3.510057000  | 0.568725000  |
| 1 | 1.811363000  | 1.975257000  | 1.521679000  |
| 1 | -0.480563000 | 3.581994000  | 0.218818000  |
| 1 | -0.555017000 | 2.504039000  | 1.664877000  |
| 8 | 0.518355000  | 0.203720000  | -1.697872000 |
| 7 | 0.891433000  | -0.586672000 | 1.252730000  |
| 1 | 0.019840000  | -1.027137000 | 0.897538000  |
| 1 | 0.673943000  | -0.222418000 | 2.185405000  |
| 6 | 1.950446000  | -1.607669000 | 1.355899000  |
| 1 | 2.887166000  | -1.122216000 | 1.684208000  |
| 1 | 1.719788000  | -2.411073000 | 2.092177000  |
| 6 | 2.209887000  | -2.289722000 | 0.007421000  |
| 1 | 1.267291000  | -2.757123000 | -0.348945000 |
| 1 | 2.937549000  | -3.105250000 | 0.163388000  |
| 8 | 2.769679000  | -1.430337000 | -0.988396000 |
| 1 | 2.050399000  | -0.834247000 | -1.286067000 |
| 7 | -1.497860000 | -1.757939000 | -0.274402000 |
| 1 | -1.284322000 | -1.110616000 | -1.043072000 |
| 1 | -1.240306000 | -2.686599000 | -0.622583000 |
| 6 | -2.941105000 | -1.716500000 | 0.032773000  |
| 1 | -3.151757000 | -2.459368000 | 0.822825000  |
| 1 | -3.581770000 | -1.964265000 | -0.839538000 |

|   |              |              |              |
|---|--------------|--------------|--------------|
| 6 | -3.344965000 | -0.333271000 | 0.543334000  |
| 1 | -2.748159000 | -0.083577000 | 1.444108000  |
| 1 | -4.408668000 | -0.353565000 | 0.837256000  |
| 8 | -3.211415000 | 0.683165000  | -0.462734000 |
| 1 | -2.273424000 | 0.959478000  | -0.465881000 |

### (EC+2HOCH<sub>2</sub>CH<sub>2</sub>NH<sub>2</sub>) TS1

E = -763.467416152

G = -763.240831

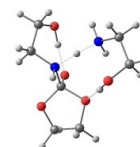

|   |              |              |              |
|---|--------------|--------------|--------------|
| 6 | -1.107542000 | 0.287860000  | -0.235338000 |
| 8 | -2.416117000 | 0.375818000  | 0.400898000  |
| 8 | -0.934309000 | -1.241136000 | -0.399065000 |
| 6 | -3.185115000 | -0.695842000 | -0.162025000 |
| 6 | -2.200115000 | -1.865126000 | -0.112364000 |
| 1 | -3.478192000 | -0.460081000 | -1.203164000 |
| 1 | -4.083699000 | -0.846667000 | 0.452973000  |
| 1 | -2.406463000 | -2.642488000 | -0.865424000 |
| 1 | -2.182075000 | -2.323593000 | 0.895036000  |
| 8 | -0.914689000 | 0.935169000  | -1.311179000 |
| 7 | -0.089923000 | 0.611135000  | 0.853681000  |
| 1 | -0.277816000 | 0.027795000  | 1.675180000  |
| 1 | 0.988656000  | 0.245309000  | 0.230783000  |
| 6 | -0.087493000 | 2.064027000  | 1.220344000  |
| 1 | -1.062987000 | 2.497709000  | 0.950167000  |
| 1 | 0.036085000  | 2.148141000  | 2.310838000  |
| 6 | 1.045276000  | 2.821030000  | 0.524121000  |
| 1 | 2.017746000  | 2.445055000  | 0.907242000  |
| 1 | 0.976052000  | 3.885706000  | 0.820769000  |
| 8 | 1.020667000  | 2.708715000  | -0.901506000 |
| 1 | 0.247751000  | 2.107227000  | -1.144435000 |
| 7 | 1.919049000  | -0.052561000 | -0.655445000 |
| 1 | 1.386704000  | -0.354736000 | -1.482543000 |
| 1 | 2.347030000  | 0.848132000  | -0.907343000 |
| 6 | 2.898782000  | -1.080116000 | -0.224643000 |
| 1 | 3.353509000  | -0.728577000 | 0.715500000  |
| 1 | 3.699177000  | -1.206174000 | -0.975261000 |
| 6 | 2.188502000  | -2.416953000 | 0.009603000  |
| 1 | 1.796181000  | -2.796160000 | -0.956553000 |
| 1 | 2.931113000  | -3.147974000 | 0.372459000  |
| 8 | 1.149614000  | -2.319283000 | 0.985041000  |
| 1 | 0.352253000  | -1.972174000 | 0.504421000  |

### (EC+2EtNH<sub>2</sub>) charge-separated intermediate

E = -763.470559589

G = -763.241019

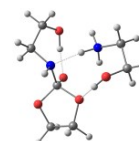

|   |              |              |              |
|---|--------------|--------------|--------------|
| 6 | -1.126642000 | 0.084821000  | -0.144355000 |
| 8 | -2.506563000 | -0.141050000 | 0.271570000  |
| 8 | -0.581382000 | -1.395588000 | -0.143825000 |
| 6 | -2.899626000 | -1.352053000 | -0.383707000 |
| 6 | -1.711818000 | -2.278854000 | -0.099015000 |
| 1 | -3.024536000 | -1.182475000 | -1.470625000 |
| 1 | -3.847484000 | -1.700294000 | 0.051143000  |
| 1 | -1.598381000 | -3.077943000 | -0.850659000 |
| 1 | -1.802312000 | -2.733385000 | 0.906616000  |
| 8 | -0.951006000 | 0.652635000  | -1.283811000 |
| 7 | -0.389809000 | 0.699251000  | 0.980066000  |
| 1 | -0.627887000 | 0.196047000  | 1.838589000  |
| 1 | 1.170084000  | 0.368997000  | 0.211366000  |
| 6 | -0.667942000 | 2.154795000  | 1.131309000  |
| 1 | -1.655285000 | 2.402275000  | 0.702709000  |
| 1 | -0.700250000 | 2.394030000  | 2.206509000  |

|   |              |              |              |
|---|--------------|--------------|--------------|
| 6 | 0.414939000  | 3.015882000  | 0.476016000  |
| 1 | 1.378928000  | 2.832483000  | 0.995141000  |
| 1 | 0.160658000  | 4.082908000  | 0.628970000  |
| 8 | 0.578794000  | 2.756005000  | -0.927655000 |
| 1 | -0.086850000 | 2.026004000  | -1.163916000 |
| 7 | 1.831162000  | 0.281041000  | -0.639685000 |
| 1 | 1.211689000  | -0.113206000 | -1.369238000 |
| 1 | 2.011932000  | 1.263173000  | -0.921493000 |
| 6 | 3.029966000  | -0.561844000 | -0.364970000 |
| 1 | 3.577634000  | -0.086856000 | 0.462165000  |
| 1 | 3.668494000  | -0.579642000 | -1.261481000 |
| 6 | 2.578621000  | -1.973775000 | 0.026214000  |
| 1 | 2.098118000  | -2.458805000 | -0.847140000 |
| 1 | 3.476377000  | -2.562223000 | 0.281256000  |
| 8 | 1.709934000  | -1.956859000 | 1.155574000  |
| 1 | 0.796395000  | -1.788109000 | 0.793642000  |

**(EC+2HOCH<sub>2</sub>CH<sub>2</sub>NH<sub>2</sub>) TS1'**

E = -763.470439664  
G = -763.239275

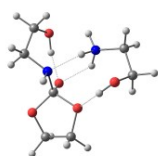

|   |              |              |              |
|---|--------------|--------------|--------------|
| 6 | 1.067873000  | 0.075982000  | -0.142710000 |
| 8 | 2.475017000  | 0.363408000  | 0.120388000  |
| 8 | 0.441746000  | 1.483048000  | 0.011159000  |
| 6 | 2.711443000  | 1.637048000  | -0.488879000 |
| 6 | 1.500555000  | 2.453975000  | -0.021655000 |
| 1 | 2.729569000  | 1.543883000  | -1.591746000 |
| 1 | 3.674429000  | 2.029830000  | -0.132038000 |
| 1 | 1.239185000  | 3.272880000  | -0.712093000 |
| 1 | 1.666958000  | 2.866276000  | 0.991769000  |
| 8 | 0.802091000  | -0.439028000 | -1.302211000 |
| 1 | -1.134579000 | -0.173805000 | -1.226445000 |
| 7 | 0.514382000  | -0.665567000 | 1.008187000  |
| 1 | 0.769453000  | -0.160143000 | 1.860615000  |
| 6 | 0.997759000  | -2.071899000 | 1.084076000  |
| 1 | 1.978679000  | -2.171516000 | 0.584985000  |
| 1 | 1.138671000  | -2.331290000 | 2.145927000  |
| 6 | 0.002671000  | -3.062185000 | 0.475961000  |
| 1 | -0.950229000 | -3.002982000 | 1.043618000  |
| 1 | 0.398251000  | -4.088030000 | 0.607297000  |
| 8 | -0.258548000 | -2.828223000 | -0.917242000 |
| 1 | 0.252205000  | -1.991474000 | -1.167710000 |
| 7 | -1.838106000 | -0.538758000 | -0.539819000 |
| 1 | -1.968657000 | -1.532572000 | -0.795736000 |
| 1 | -1.246620000 | -0.550247000 | 0.348638000  |
| 6 | -3.083693000 | 0.269800000  | -0.416006000 |
| 1 | -3.704790000 | -0.201077000 | 0.360334000  |
| 1 | -3.619981000 | 0.242469000  | -1.376792000 |
| 6 | -2.721472000 | 1.704815000  | -0.019329000 |
| 1 | -2.174885000 | 2.189067000  | -0.851720000 |
| 1 | -3.658843000 | 2.265028000  | 0.139856000  |
| 8 | -1.956382000 | 1.732662000  | 1.183935000  |
| 1 | -1.004956000 | 1.683833000  | 0.895696000  |

**(EC+2EtNH<sub>2</sub>) tetrahedral intermediate 1**

E = -763.473196518  
G = -763.245871

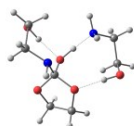

|   |              |             |              |
|---|--------------|-------------|--------------|
| 6 | 0.598697000  | 0.735794000 | 0.143087000  |
| 8 | 1.305074000  | 1.842712000 | -0.403874000 |
| 8 | -0.614270000 | 1.326232000 | 0.716587000  |
| 6 | 0.284729000  | 2.685682000 | -0.974514000 |
| 6 | -0.830382000 | 2.612465000 | 0.078722000  |
| 1 | -0.044477000 | 2.283701000 | -1.948491000 |

|   |              |              |              |
|---|--------------|--------------|--------------|
| 1 | 0.701903000  | 3.693382000  | -1.104394000 |
| 1 | -1.841314000 | 2.644072000  | -0.355570000 |
| 1 | -0.731046000 | 3.399557000  | 0.844454000  |
| 8 | 0.283587000  | -0.140917000 | -0.881106000 |
| 1 | -0.278017000 | -0.947399000 | -0.464751000 |
| 7 | 1.281401000  | 0.104618000  | 1.233315000  |
| 1 | 1.331714000  | 0.787412000  | 1.993926000  |
| 6 | 2.636353000  | -0.433610000 | 0.957980000  |
| 1 | 3.269057000  | 0.288383000  | 0.404602000  |
| 1 | 3.096969000  | -0.593902000 | 1.946495000  |
| 6 | 2.648443000  | -1.768271000 | 0.200199000  |
| 1 | 1.853919000  | -2.418684000 | 0.628138000  |
| 1 | 3.617106000  | -2.264408000 | 0.382719000  |
| 1 | -1.178887000 | -1.804306000 | 1.155781000  |
| 6 | -2.520456000 | -2.051854000 | -0.392617000 |
| 1 | -2.485823000 | -2.458626000 | -1.416904000 |
| 7 | -1.142757000 | -2.054040000 | 0.160640000  |
| 6 | -3.047668000 | -0.613246000 | -0.426998000 |
| 1 | -2.450375000 | -0.023326000 | -1.149092000 |
| 1 | -4.095698000 | -0.619311000 | -0.773678000 |
| 1 | -3.199138000 | -2.684733000 | 0.208878000  |
| 1 | -0.722660000 | -2.986740000 | 0.105614000  |
| 8 | -3.007481000 | -0.011573000 | 0.873495000  |
| 1 | -2.128113000 | 0.432901000  | 0.935155000  |
| 8 | 2.528993000  | -1.641957000 | -1.218939000 |
| 1 | 1.728854000  | -1.079750000 | -1.355026000 |

**(EC+2EtNH<sub>2</sub>) tetrahedral intermediate 2**

E = -763.471154873  
G = -763.243197

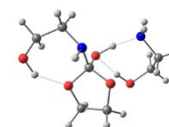

|   |              |              |              |
|---|--------------|--------------|--------------|
| 6 | -0.547896000 | 0.096002000  | -0.259149000 |
| 8 | -1.296922000 | 1.224130000  | 0.253126000  |
| 8 | 0.327572000  | 0.666113000  | -1.244967000 |
| 6 | -0.359276000 | 2.315756000  | 0.306029000  |
| 6 | 0.544573000  | 2.059376000  | -0.917084000 |
| 1 | 0.210095000  | 2.285038000  | 1.251175000  |
| 1 | -0.923263000 | 3.256856000  | 0.247364000  |
| 1 | 1.605587000  | 2.223105000  | -0.676022000 |
| 1 | 0.250213000  | 2.663735000  | -1.790708000 |
| 8 | 0.146308000  | -0.475283000 | 0.800522000  |
| 1 | 0.843267000  | -1.140997000 | 0.367714000  |
| 7 | -1.373829000 | -0.857652000 | -0.928468000 |
| 1 | -1.908116000 | -0.370944000 | -1.652968000 |
| 6 | -2.265116000 | -1.688637000 | -0.093546000 |
| 1 | -2.858290000 | -2.294950000 | -0.797424000 |
| 1 | -1.650791000 | -2.378256000 | 0.508504000  |
| 6 | -3.208520000 | -0.901202000 | 0.836154000  |
| 1 | -2.629713000 | -0.486912000 | 1.682615000  |
| 1 | -3.972012000 | -1.584649000 | 1.245877000  |
| 1 | 1.661659000  | -2.272874000 | -1.192328000 |
| 6 | 3.147613000  | -0.950615000 | -0.583255000 |
| 1 | 4.027215000  | -1.467470000 | -1.011862000 |
| 7 | 2.033139000  | -1.898270000 | -0.313098000 |
| 6 | 3.571774000  | -0.212853000 | 0.690486000  |
| 1 | 3.757161000  | -0.956696000 | 1.496957000  |
| 1 | 4.529295000  | 0.299153000  | 0.498512000  |
| 1 | 2.780468000  | -0.217703000 | -1.317605000 |
| 1 | 2.372497000  | -2.698369000 | 0.232131000  |
| 8 | 2.656989000  | 0.800531000  | 1.122482000  |
| 1 | 1.755238000  | 0.402689000  | 1.160659000  |
| 8 | -3.901165000 | 0.144109000  | 0.135154000  |
| 1 | -3.226853000 | 0.846925000  | 0.030021000  |

**(EC+2HOCH<sub>2</sub>CH<sub>2</sub>NH<sub>2</sub>) TS2**

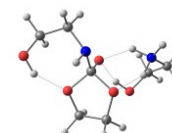

E = -763.464017632

G = -763.234609

|   |              |              |              |
|---|--------------|--------------|--------------|
| 6 | -0.542018000 | 0.050575000  | -0.220619000 |
| 8 | -1.313084000 | 1.226960000  | 0.261733000  |
| 8 | 0.354124000  | 0.760164000  | -1.271982000 |
| 6 | -0.370084000 | 2.294827000  | 0.374798000  |
| 6 | 0.494853000  | 2.141589000  | -0.895040000 |
| 1 | 0.234684000  | 2.188597000  | 1.294516000  |
| 1 | -0.918484000 | 3.247171000  | 0.412435000  |
| 1 | 1.551966000  | 2.380585000  | -0.694382000 |
| 1 | 0.117634000  | 2.772025000  | -1.719682000 |
| 8 | 0.149110000  | -0.551140000 | 0.709472000  |
| 1 | 1.349184000  | -1.473424000 | -0.237116000 |
| 7 | -1.394363000 | -0.801925000 | -1.004427000 |
| 1 | -1.984238000 | -0.213319000 | -1.599327000 |
| 6 | -2.236035000 | -1.734821000 | -0.228218000 |
| 1 | -2.879821000 | -2.254406000 | -0.957572000 |
| 1 | -1.586813000 | -2.487609000 | 0.248855000  |
| 6 | -3.107569000 | -1.061930000 | 0.850113000  |
| 1 | -2.459091000 | -0.735095000 | 1.684695000  |
| 1 | -3.837960000 | -1.789244000 | 1.245466000  |
| 1 | 1.689819000  | -0.345333000 | -1.319771000 |
| 6 | 3.446754000  | -1.047657000 | -0.309059000 |
| 1 | 3.977786000  | -2.011377000 | -0.298876000 |
| 7 | 2.103600000  | -1.251075000 | -0.953673000 |
| 6 | 3.269294000  | -0.516540000 | 1.119515000  |
| 1 | 2.842011000  | -1.322635000 | 1.751125000  |
| 1 | 4.270840000  | -0.281418000 | 1.518580000  |
| 1 | 4.005823000  | -0.333967000 | -0.931437000 |
| 1 | 2.121055000  | -1.947257000 | -1.707364000 |
| 8 | 2.469348000  | 0.656610000  | 1.170458000  |
| 1 | 1.519304000  | 0.324881000  | 1.095374000  |
| 8 | -3.850529000 | 0.049154000  | 0.321721000  |
| 1 | -3.181283000 | 0.762576000  | 0.241021000  |

#### (EC+2HOCH<sub>2</sub>CH<sub>2</sub>NH<sub>2</sub>) product

E = -763.506326919

G = -763.283924

|   |              |              |              |
|---|--------------|--------------|--------------|
| 6 | 0.981009000  | 0.514872000  | -0.183730000 |
| 8 | 0.638675000  | 1.619452000  | -0.902524000 |
| 8 | -1.286091000 | 1.816276000  | 1.196568000  |
| 6 | -0.776815000 | 1.802577000  | -1.201229000 |
| 6 | -1.458189000 | 2.507917000  | -0.029883000 |
| 1 | -1.251637000 | 0.833646000  | -1.413106000 |
| 1 | -0.801739000 | 2.420933000  | -2.111395000 |
| 1 | -2.527995000 | 2.648992000  | -0.302944000 |
| 1 | -1.014491000 | 3.511139000  | 0.097555000  |
| 8 | 0.323962000  | -0.530977000 | -0.095122000 |
| 7 | 2.204456000  | 0.678425000  | 0.386107000  |
| 1 | 2.619221000  | 1.606033000  | 0.357415000  |
| 6 | 2.839965000  | -0.380934000 | 1.172997000  |
| 1 | 3.604115000  | 0.097909000  | 1.803011000  |
| 1 | 2.089024000  | -0.855883000 | 1.826610000  |
| 6 | 3.495771000  | -1.434030000 | 0.272370000  |
| 1 | 2.712499000  | -1.945235000 | -0.320761000 |
| 1 | 3.999862000  | -2.189370000 | 0.896671000  |
| 1 | -1.742455000 | 0.919446000  | 1.120551000  |
| 6 | -3.515409000 | -1.262113000 | 0.410222000  |
| 1 | -4.249980000 | -1.925715000 | 0.911087000  |
| 7 | -2.615542000 | -0.592052000 | 1.380138000  |
| 1 | -1.931289000 | -1.271075000 | 1.733953000  |
| 6 | -2.741986000 | -2.113840000 | -0.598147000 |

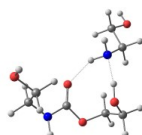

|   |              |              |              |
|---|--------------|--------------|--------------|
| 1 | -2.174822000 | -2.896712000 | -0.047975000 |
| 1 | -3.473248000 | -2.636355000 | -1.238804000 |
| 1 | -4.082132000 | -0.484517000 | -0.130330000 |
| 1 | -3.161478000 | -0.292780000 | 2.195289000  |
| 8 | -1.882989000 | -1.376186000 | -1.466112000 |
| 1 | -1.095079000 | -1.086659000 | -0.941245000 |
| 8 | 4.502923000  | -0.861159000 | -0.573682000 |
| 1 | 4.041320000  | -0.204350000 | -1.127922000 |

#### D. Hydroxylamine one-molecule pathway

##### EC...HOCH<sub>2</sub>CH<sub>2</sub>NH<sub>2</sub>

E = -552.993393881

G = -552.858955

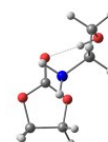

|   |              |              |              |
|---|--------------|--------------|--------------|
| 6 | 0.921777000  | 0.833506000  | -0.312068000 |
| 8 | 1.773676000  | 0.103759000  | -1.073387000 |
| 8 | 1.120614000  | 0.631680000  | 1.011471000  |
| 6 | 2.649791000  | -0.657501000 | -0.189714000 |
| 6 | 1.942546000  | -0.557534000 | 1.167766000  |
| 1 | 3.640037000  | -0.176448000 | -0.194448000 |
| 1 | 2.723300000  | -1.683366000 | -0.572985000 |
| 1 | 2.624793000  | -0.397711000 | 2.011897000  |
| 1 | 1.271445000  | -1.406940000 | 1.360880000  |
| 8 | 0.132149000  | 1.639279000  | -0.765772000 |
| 7 | -0.792304000 | -1.314492000 | -0.495765000 |
| 6 | -2.169416000 | -1.302329000 | 0.039438000  |
| 1 | -2.841274000 | -2.040205000 | -0.452930000 |
| 1 | -2.122998000 | -1.560008000 | 1.111818000  |
| 6 | -2.819220000 | 0.079325000  | -0.095301000 |
| 1 | -3.874528000 | -0.004174000 | 0.218984000  |
| 1 | -2.821773000 | 0.376066000  | -1.166817000 |
| 1 | -0.810962000 | -1.059120000 | -1.489753000 |
| 8 | -2.225790000 | 1.088150000  | 0.722180000  |
| 1 | -1.382823000 | 1.344960000  | 0.288432000  |
| 1 | -0.417145000 | -2.267356000 | -0.461381000 |

##### EC...HOCH<sub>2</sub>CH<sub>2</sub>NH<sub>2</sub> TS1

E = -552.953868467

G = -552.819458

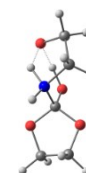

|   |              |              |              |
|---|--------------|--------------|--------------|
| 6 | -0.406067000 | -0.272125000 | 0.187452000  |
| 8 | -1.333221000 | -0.969001000 | -0.662379000 |
| 8 | -1.130760000 | 0.727335000  | 0.874175000  |
| 6 | -2.658680000 | -0.479111000 | -0.356886000 |
| 6 | -2.372538000 | 0.925873000  | 0.160309000  |
| 1 | -3.125396000 | -1.110043000 | 0.420767000  |
| 1 | -3.264086000 | -0.504872000 | -1.274245000 |
| 1 | -3.116687000 | 1.309761000  | 0.871094000  |
| 1 | -2.236284000 | 1.649950000  | -0.665680000 |
| 8 | 0.290683000  | -1.031510000 | 1.033872000  |
| 1 | 1.291244000  | -1.205490000 | 0.568424000  |
| 7 | 0.577156000  | 0.372593000  | -0.825540000 |
| 1 | 0.075995000  | 0.752869000  | -1.632513000 |
| 6 | 1.584199000  | 1.280621000  | -0.208462000 |
| 1 | 1.876200000  | 2.029613000  | -0.956832000 |
| 1 | 1.146710000  | 1.784181000  | 0.662844000  |
| 6 | 2.773249000  | 0.297053000  | 0.173400000  |
| 1 | 2.951028000  | 0.351368000  | 1.263053000  |
| 1 | 3.698353000  | 0.614845000  | -0.341683000 |
| 8 | 2.399175000  | -1.012689000 | -0.229473000 |
| 1 | 1.334842000  | -0.507277000 | -1.000887000 |

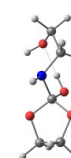

**EC...HOCH<sub>2</sub>CH<sub>2</sub>NH<sub>2</sub> tetrahedral intermediate 1**

E = -552.975956137  
G = -552.838390

|   |              |              |              |
|---|--------------|--------------|--------------|
| 6 | -0.451631000 | -0.070099000 | 0.074636000  |
| 8 | -1.265171000 | -0.862335000 | -0.794870000 |
| 8 | -1.332266000 | 0.914413000  | 0.663301000  |
| 6 | -2.618372000 | -0.733947000 | -0.313657000 |
| 6 | -2.649598000 | 0.728707000  | 0.111599000  |
| 1 | -2.791000000 | -1.409590000 | 0.544729000  |
| 1 | -3.302796000 | -0.985593000 | -1.135698000 |
| 1 | -3.394879000 | 0.953397000  | 0.889358000  |
| 1 | -2.806947000 | 1.396596000  | -0.757759000 |
| 8 | 0.071757000  | -0.777351000 | 1.151859000  |
| 1 | 0.973583000  | -1.097080000 | 0.890706000  |
| 7 | 0.592014000  | 0.476467000  | -0.757216000 |
| 1 | 0.171840000  | 1.043290000  | -1.493790000 |
| 6 | 1.686877000  | 1.165398000  | -0.046367000 |
| 1 | 1.880292000  | 2.147454000  | -0.506336000 |
| 1 | 1.410565000  | 1.339346000  | 1.006243000  |
| 6 | 2.957638000  | 0.294226000  | -0.122811000 |
| 1 | 3.674658000  | 0.569843000  | 0.665188000  |
| 1 | 3.451785000  | 0.416727000  | -1.104043000 |
| 8 | 2.638464000  | -1.106826000 | 0.080198000  |
| 1 | 2.137048000  | -1.358576000 | -0.722396000 |

**EC...HOCH<sub>2</sub>CH<sub>2</sub>NH<sub>2</sub> tetrahedral intermediate 2**

E = -552.976377031  
G = -552.837235

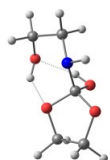

|   |              |              |              |
|---|--------------|--------------|--------------|
| 6 | -0.403120000 | 0.413290000  | 0.136480000  |
| 8 | -0.616564000 | -0.815982000 | -0.606645000 |
| 8 | -1.623550000 | 1.103566000  | 0.109017000  |
| 6 | -1.960408000 | -1.203125000 | -0.245374000 |
| 6 | -2.678382000 | 0.153618000  | -0.205765000 |
| 1 | -1.967974000 | -1.702290000 | 0.738864000  |
| 1 | -2.342329000 | -1.883183000 | -1.018391000 |
| 1 | -3.458745000 | 0.203650000  | 0.568436000  |
| 1 | -3.103588000 | 0.426975000  | -1.185443000 |
| 8 | -0.120456000 | 0.098704000  | 1.487938000  |
| 1 | 0.674134000  | -0.488938000 | 1.460233000  |
| 7 | 0.598665000  | 1.190365000  | -0.552125000 |
| 1 | 0.302767000  | 2.167698000  | -0.514801000 |
| 6 | 1.991369000  | 1.046958000  | -0.091269000 |
| 1 | 2.585264000  | 1.811079000  | -0.618690000 |
| 1 | 2.103009000  | 1.228305000  | 0.997555000  |
| 6 | 2.576501000  | -0.325428000 | -0.431104000 |
| 1 | 3.640037000  | -0.345568000 | -0.143958000 |
| 1 | 2.502718000  | -0.506537000 | -1.518875000 |
| 8 | 1.936695000  | -1.404166000 | 0.298731000  |
| 1 | 1.109283000  | -1.612597000 | -0.190189000 |

**EC...HOCH<sub>2</sub>CH<sub>2</sub>NH<sub>2</sub> TS2**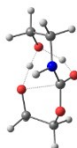

E = -552.963022742  
G = -552.827695

|             |              |              |              |
|-------------|--------------|--------------|--------------|
| 6           | 0.229394000  | -0.876885000 | 0.142515000  |
| 8           | 0.639017000  | 1.205893000  | -0.615221000 |
| 8           | 1.468836000  | -1.209486000 | -0.216960000 |
| 6           | 2.025818000  | 1.141755000  | -0.437025000 |
| 6           | 2.430526000  | -0.195854000 | 0.250028000  |
| 1           | 2.443512000  | 1.962283000  | 0.188521000  |
| 1           | 2.541167000  | 1.190252000  | -1.421232000 |
| 1           | 2.374476000  | -0.139223000 | 1.346249000  |
| 1           | 3.415870000  | -0.568447000 | -0.057843000 |
| 8           | -0.008030000 | -0.567584000 | 1.399285000  |
| 1           | -0.739520000 | 0.230220000  | 1.356160000  |
| 7           | -0.778551000 | -1.237211000 | -            |
| 0.674469000 |              |              |              |
| 1           | -0.531641000 | -1.237919000 | -            |
| 1.665844000 |              |              |              |
| 6           | -2.147836000 | -0.798423000 | -            |
| 0.332842000 |              |              |              |
| 1           | -2.825828000 | -1.201941000 | -1.097928000 |
| 1           | -2.421296000 | -1.249903000 | 0.634000000  |
| 6           | -2.290960000 | 0.730825000  | -0.266228000 |
| 1           | -3.331341000 | 0.975770000  | 0.004942000  |
| 1           | -2.068861000 | 1.176064000  | -1.251169000 |
| 8           | -1.404218000 | 1.325883000  | 0.725169000  |
| 1           | -0.453172000 | 1.477164000  | 0.208550000  |

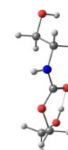**EC...HOCH<sub>2</sub>CH<sub>2</sub>NH<sub>2</sub> product**

E = -553.006586716  
G = -552.872099

|   |              |              |              |
|---|--------------|--------------|--------------|
| 7 | 0.954344000  | -1.196934000 | -0.070507000 |
| 1 | 0.946632000  | -1.989682000 | 0.568141000  |
| 6 | 2.232460000  | -0.594709000 | -0.439004000 |
| 1 | 2.969620000  | -1.397041000 | -0.593299000 |
| 1 | 2.097040000  | -0.064046000 | -1.394672000 |
| 6 | 2.749903000  | 0.387954000  | 0.626418000  |
| 1 | 2.887087000  | -0.139414000 | 1.584682000  |
| 1 | 1.998423000  | 1.186965000  | 0.782254000  |
| 6 | -0.224715000 | -0.557403000 | -0.288011000 |
| 8 | -0.348976000 | 0.465185000  | -0.974873000 |
| 8 | -1.247507000 | -1.206239000 | 0.336210000  |
| 6 | -2.612571000 | -0.784074000 | 0.005834000  |
| 1 | -2.733748000 | -0.758211000 | -1.090165000 |
| 1 | -3.224509000 | -1.597132000 | 0.421863000  |
| 6 | -3.016185000 | 0.555158000  | 0.619621000  |
| 1 | -4.116139000 | 0.561357000  | 0.719917000  |
| 1 | -2.592650000 | 0.603952000  | 1.646799000  |
| 8 | -2.663465000 | 1.693373000  | -0.165151000 |
| 1 | -1.769079000 | 1.487356000  | -0.525126000 |
| 8 | 4.033044000  | 0.917543000  | 0.270659000  |
| 1 | 3.898788000  | 1.483990000  | -0.510748000 |
